# Supplementary material for: Solvent-Free Synthesis of Ultrafine Tungsten Carbide Nanoparticles-Decorated Carbon Nanosheets for Microwave Absorption
Source: PubMed Central journal article supplement (PMC7770940; doi:10.1007/s40820-020-00491-5), 2020-07-18
Supplement: 40820_2020_491_MOESM1_ESM.pdf [file 40820_2020_491_MOESM1_ESM.pdf]

Supporting Information for

## Solvent-Free Synthesis of Ultrafine Tungsten Carbide Nanoparticles Decorated Carbon Nanosheets for Microwave Absorption

Yunlong Lian<sup>1</sup>, Binhua Han<sup>1</sup>, Dawei Liu<sup>1</sup>, Yahui Wang<sup>1</sup>, Honghong Zhao<sup>1</sup>, Ping Xu<sup>1</sup>, Xijiang Han<sup>1,\*</sup>, Yunchen Du<sup>1,\*</sup>

Yunlong Lian and Binhua Han contributed equally to this work.

<sup>1</sup>MIIT Key Laboratory of Critical Materials Technology for New Energy Conversion and Storage, School of Chemistry and Chemical Engineering, Harbin Institute of Technology, Harbin 150001, People's Republic of China

\*Corresponding authors. E-mail: [yunchendu@hit.edu.cn](mailto:yunchendu@hit.edu.cn) (Yunchen Du); [hanxijiang@hit.edu.cn](mailto:hanxijiang@hit.edu.cn) (Xijiang Han)

### Supplementary Figures

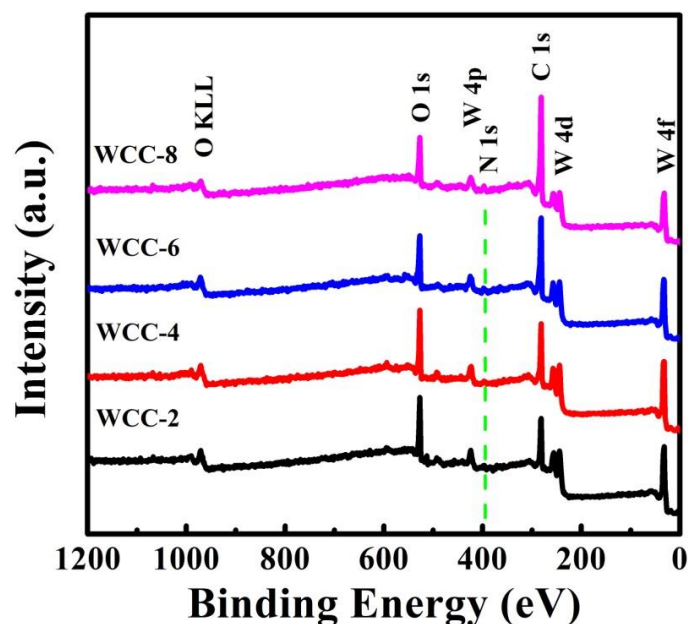

**Fig. S1** Survey XPS spectra of different tungsten carbide/carbon composites

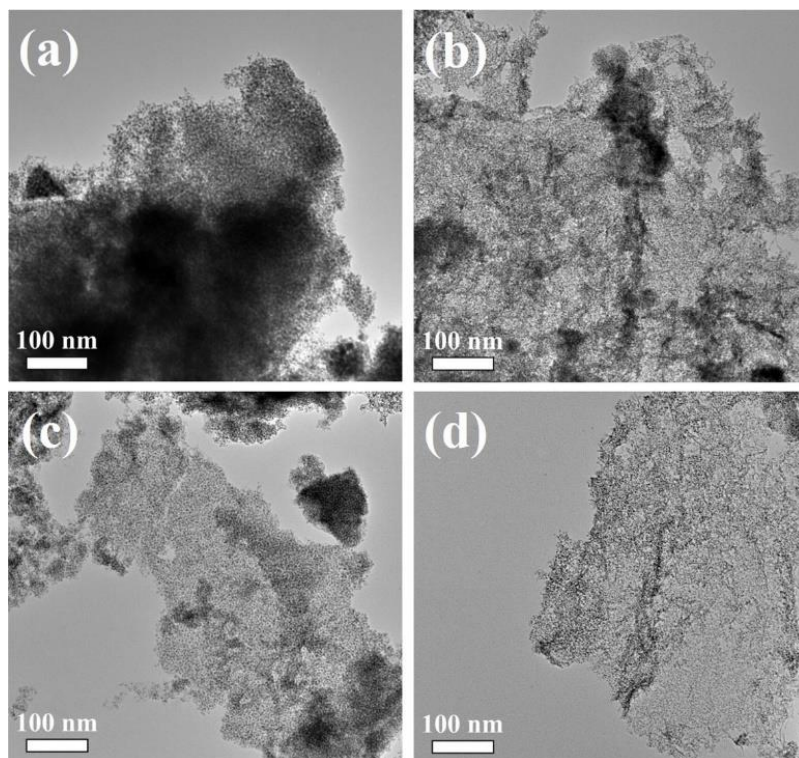

**Fig. S2** Low-magnification TEM images of **a** WCC-2, **b** WCC-4, **c** WCC-6, and **d** WCC-8

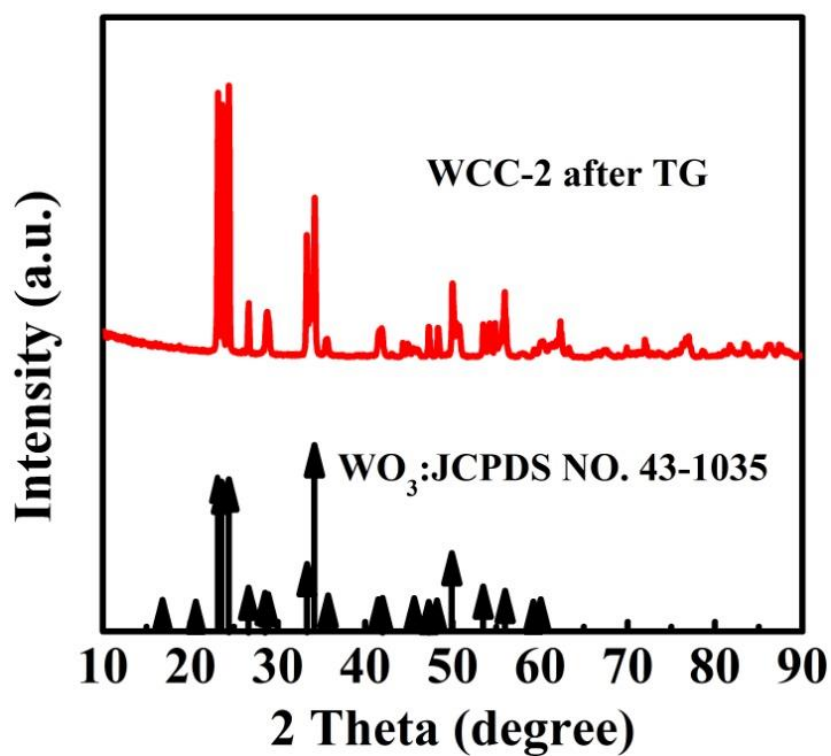

**Fig. S3** XRD pattern of the final product of WCC-2 after TG measurement

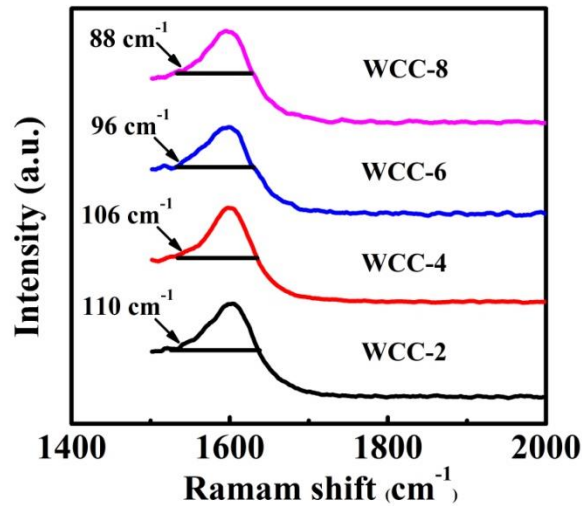

**Fig. S4** The local amplification of G band in Raman spectra of different tungsten carbide/carbon composites

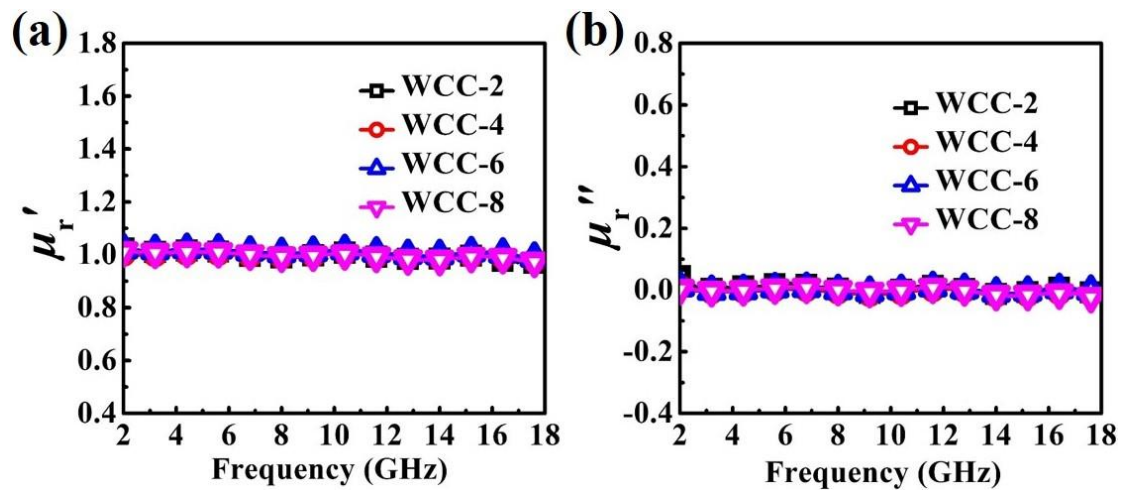

**Fig. S5 a** Real parts and **b** imaginary parts of relative complex permeability of different tungsten carbide/carbon composites

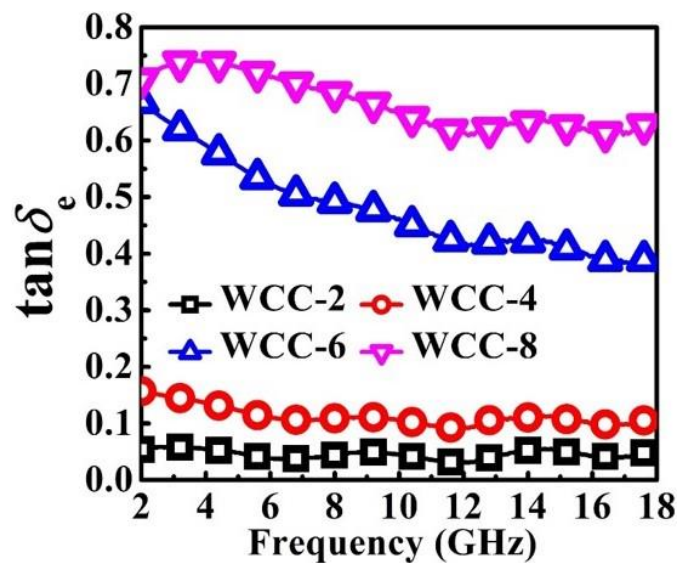

**Fig. S6** Dielectric loss tangents of different tungsten carbide/carbon composites

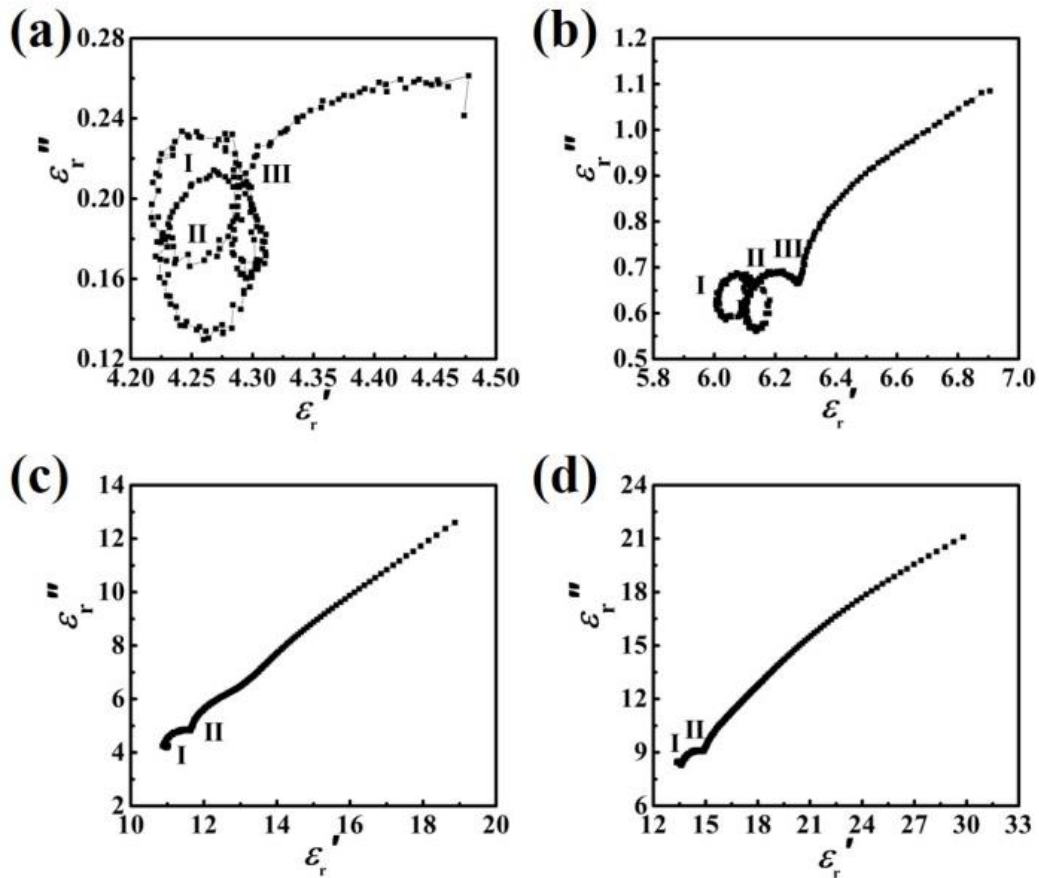

**Fig. S7** The curves of  $\epsilon_r''$  vs.  $\epsilon_r'$  (Cole–Cole semicircles) of **a** WCC-2, **b** WCC-4, **c** WCC-6, and **d** WCC-8

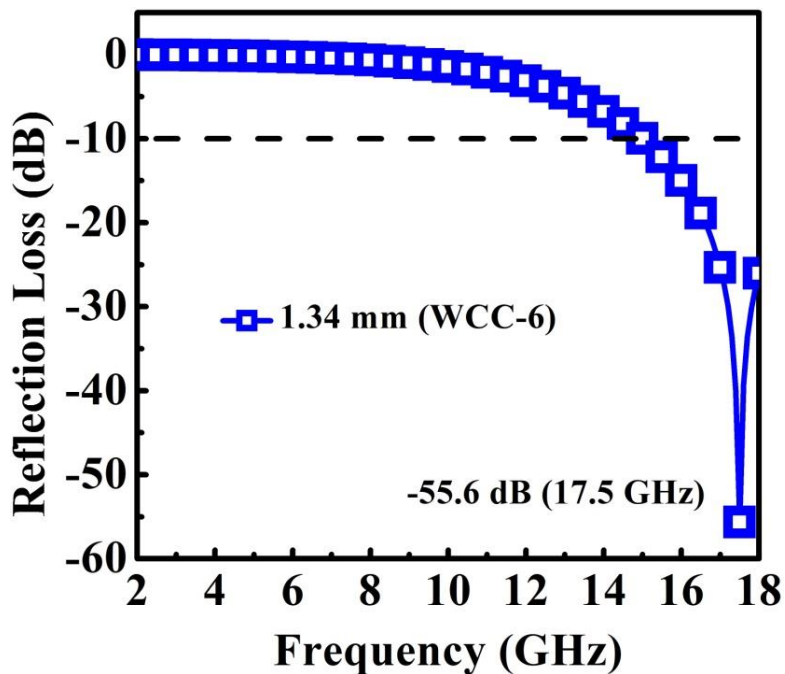

**Fig. S8** RL curve of WCC-6 with the thickness of 1.34 mm

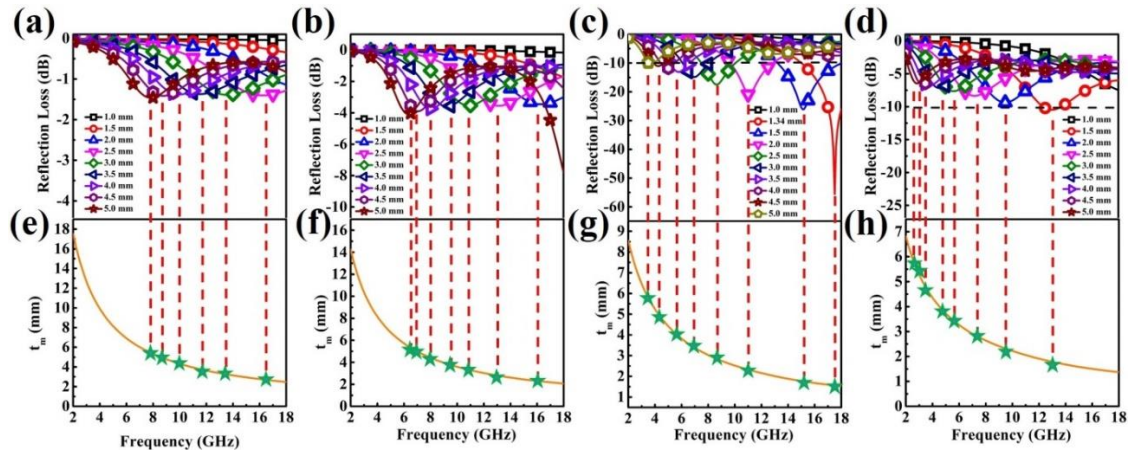

**Fig. S9** RL curves and dependence of matching thickness ( $t_m$ ) on matching frequency ( $f_m$ ) of **a, e** WCC-2, **b, f** WCC-4, **c, g** WCC-6, and **d, h** WCC-8.

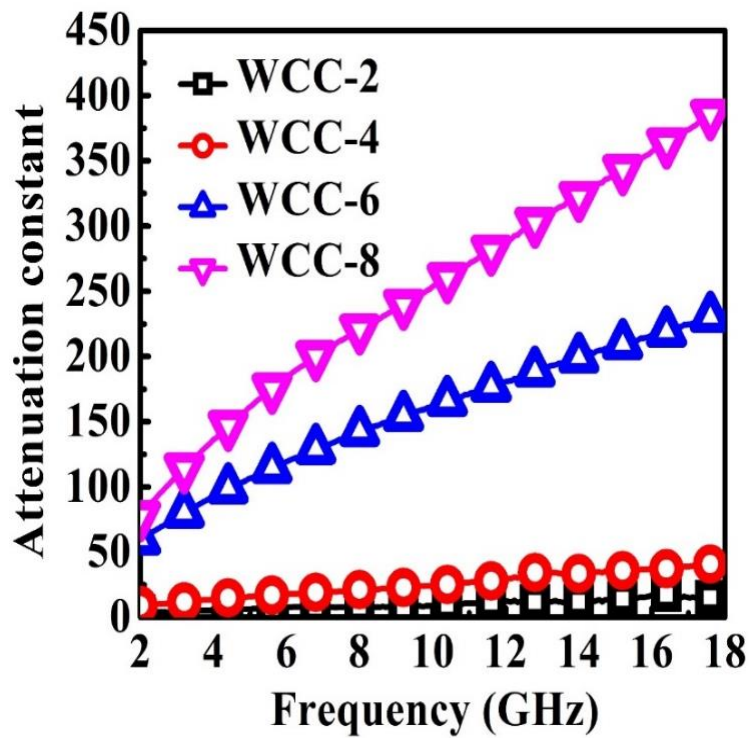

**Fig. S10** Frequency-dependent attenuation constants ( $\alpha$ ) of different tungsten carbide/carbon composites

The values of  $\alpha$  can be calculated by the following equation:

$$\alpha = \frac{\sqrt{2}\pi f}{c} \sqrt{(\mu_r''\epsilon_r'' - \mu_r'\epsilon_r') + \sqrt{(\mu_r''\epsilon_r'' - \mu_r'\epsilon_r')^2 + (\mu_r'\epsilon_r'' + \mu_r''\epsilon_r')^2}}$$

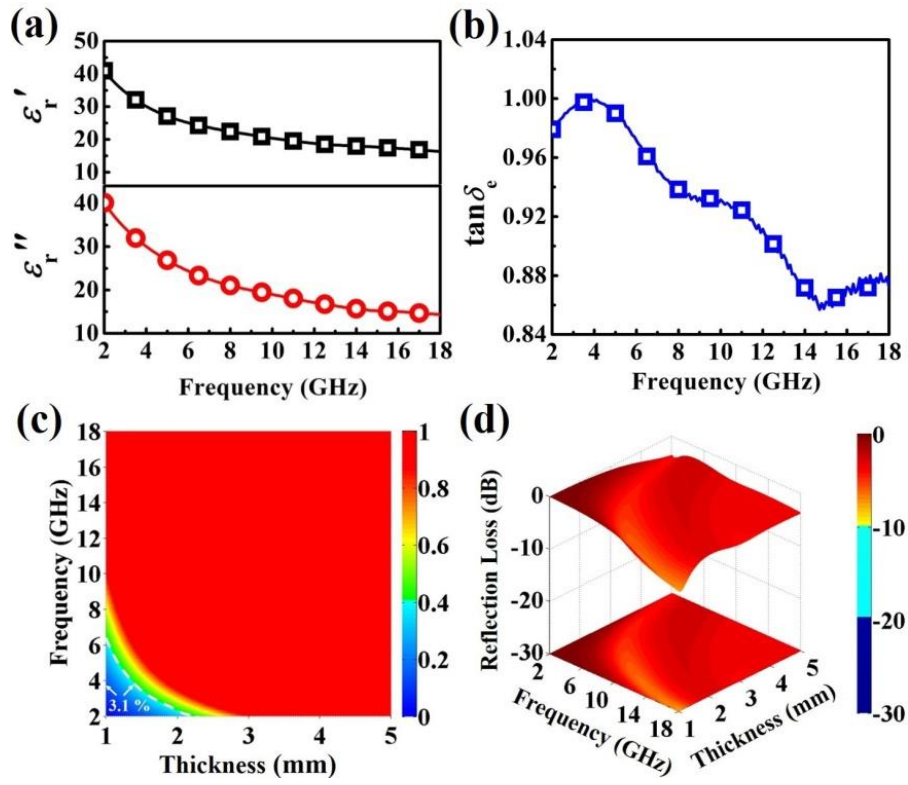

**Fig. S11** **a** Relative complex permittivity, **b** dielectric loss tangent, **c** delta map, and **d** RL map of WCC-10
